# Supplementary material
Source: publisher site journal article supplement (https://www.dovepress.com/get_supplementary_file.php?f=470861.docx)
Supplement: Supplementary file 1 [file get_supplementary_file.php]

**Table S1: Docking results of shortlisted polyphenols against disease target (PI3K)**

| **S.No** | **Target** | **Ligand** | **Binding score** |
| --- | --- | --- | --- |
| 1 | 7TZ7 | Ellagic acid | -6.60 |
| 2 | Ferulic acid | -3.83 |
| 3 | Kaempferol | -4.89 |
| 4 | Genistein | -4.30 |
| 5 | Luteolin | -4.39 |
| 6 | Naringenin | -4.67 |
| 7 | Quercetin | -3.87 |
| 8 | Apigenin | -4.61 |

**
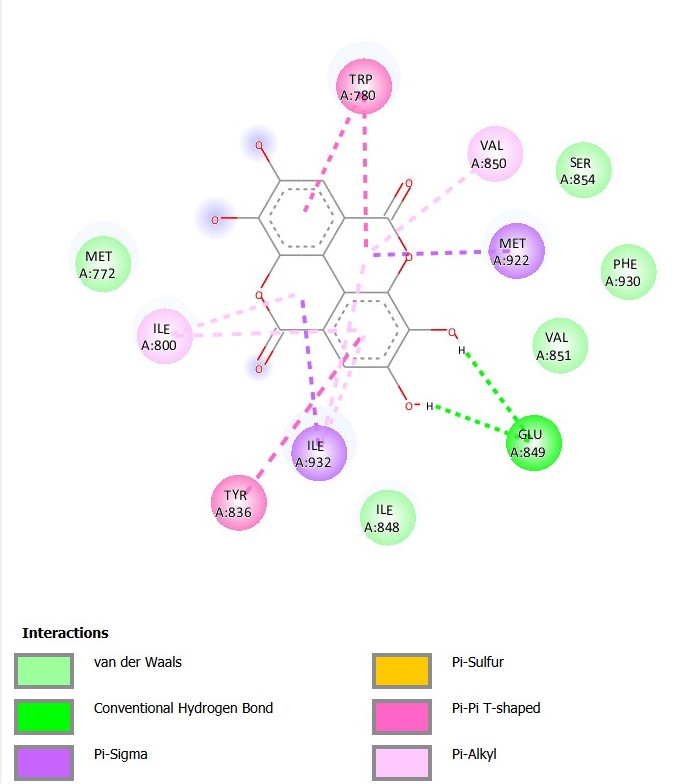
**

**Figure S1** 2D Docking interactions of Ellagic acid with PI3K


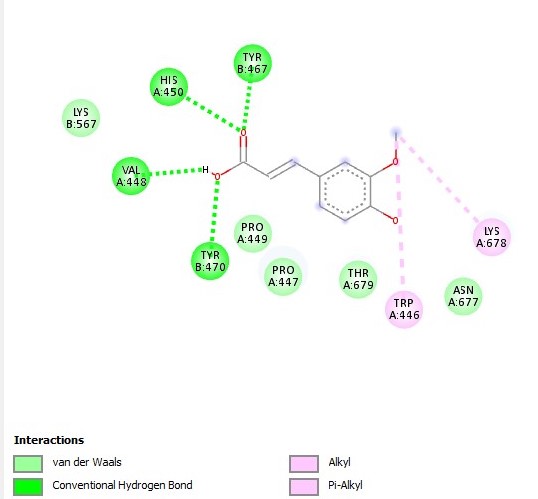


**Figure S2** 2D Docking interactions of Ferulic acid with PI3K


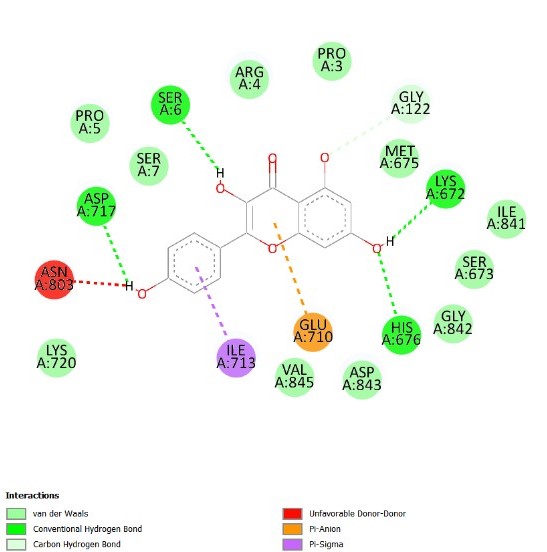


**Figure S3** 2D Docking interactions of Kaempferol with PI3K


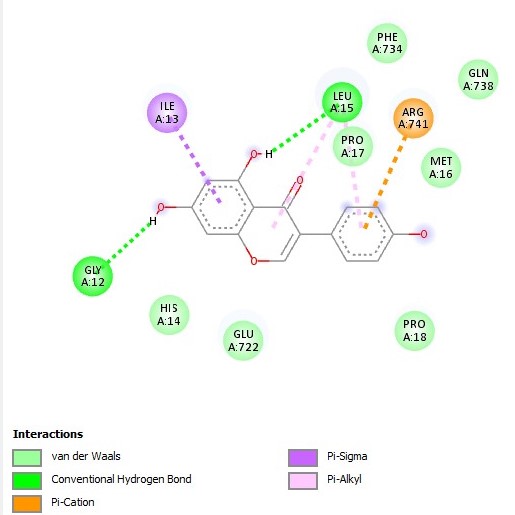


**Figure S4** 2D Docking interactions of Genistein with PI3K


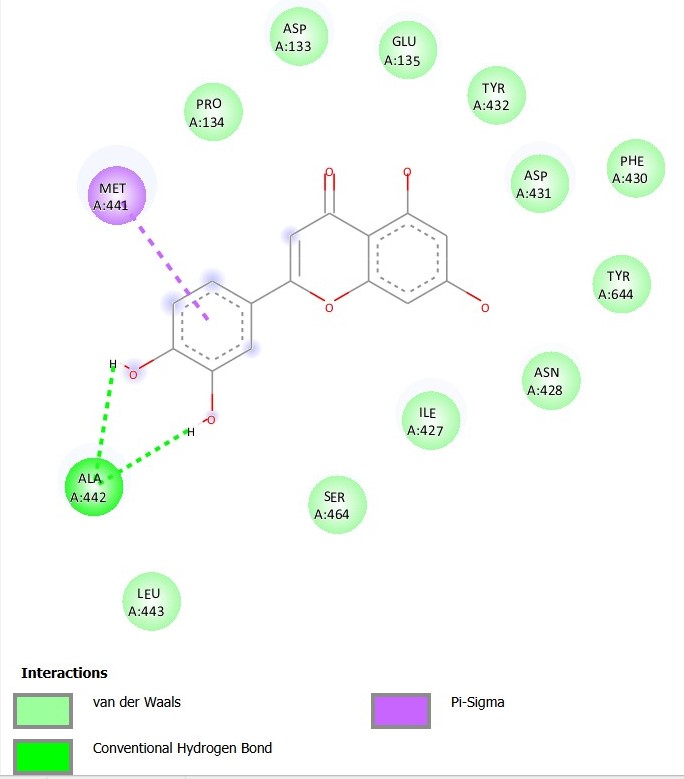


**Figure S5** 2D Docking interactions of Luteolin with PI3K


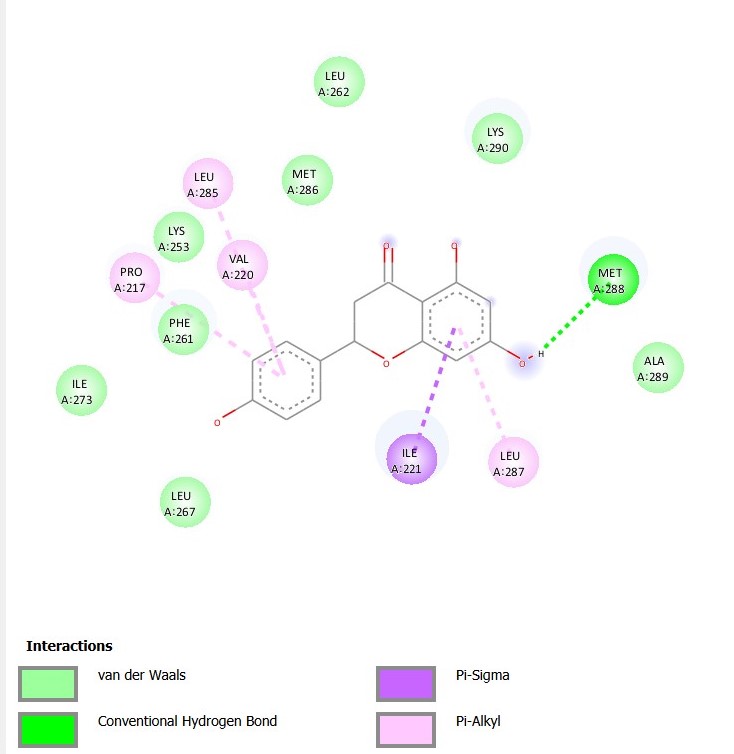


**Figure S6** 2D Docking interactions of Naringenin with PI3K


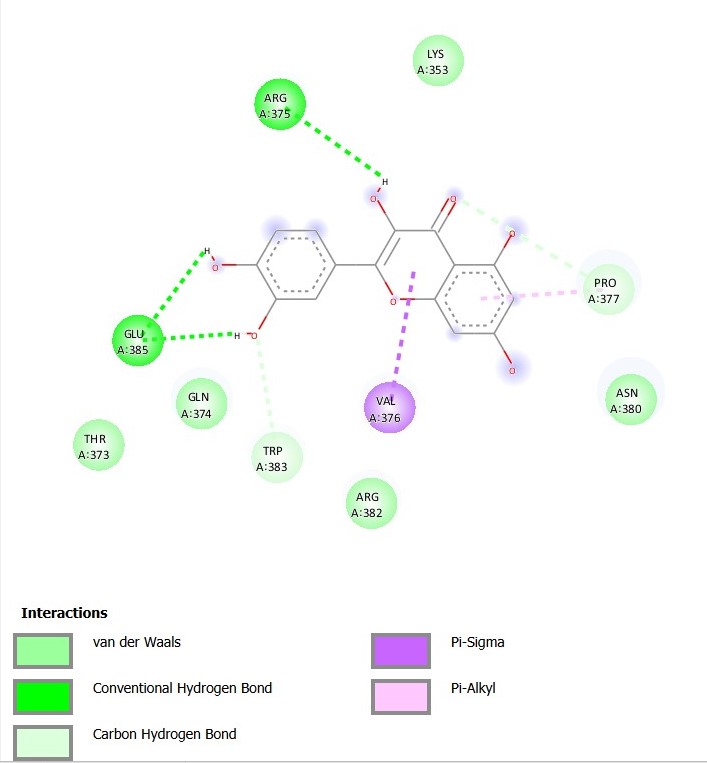


**Figure S7** 2D Docking interactions of Quercetin with PI3K


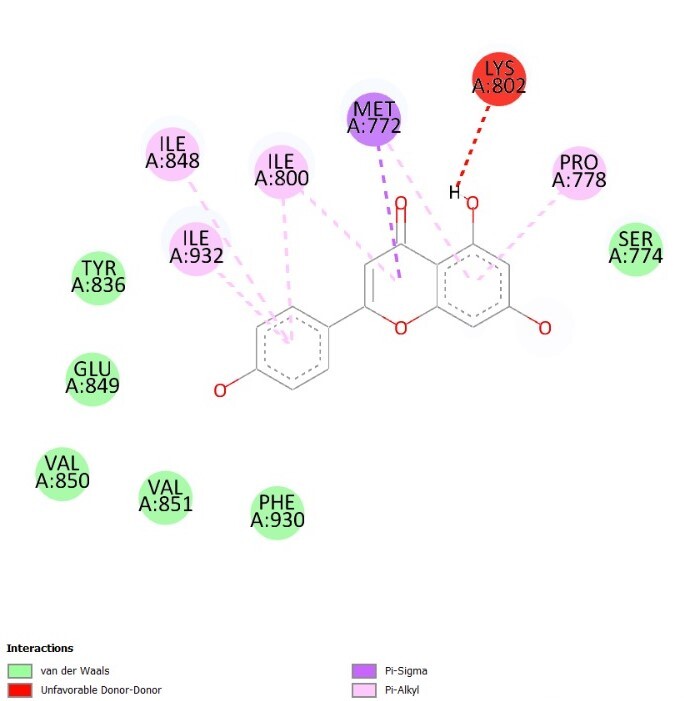


**Figure S8** 2D Docking interactions of Apigenin with PI3K
